# Supplementary material for: Interrogating the structure and function of the human voltage-gated proton channel (hHv1) with a fluorescent noncanonical amino acid
Source: eLife. 2026 Apr 28;15:RP110161. doi: 10.7554/eLife.110161 (PMC13124150; doi:10.7554/eLife.110161)
Supplement: Figure 2—figure supplement 1—source data 1. [file elife-110161-fig2-figsupp1-data1.xlsx]

## Sheet: Sheet1
Experiment 1			Experiment 2
hHv1	OD600		hHv1	OD600
A18TAG	11.5		F159TAG	9.3
Q56TAG	12.2		K169TAG	9.3
M91TAG	11.7		V187TAG	9.4
V103TAG	12		F195TAG	8.6
C107TAG	11.2		I217TAG	11
K125TAG	11.5		Q233TAG	10.3
Y134TAG	11.1		F247TAG	11.6
Cysless1	11.4		Cysless	10.1
