# Supplementary material for: Interrogating the structure and function of the human voltage-gated proton channel (hHv1) with a fluorescent noncanonical amino acid
Source: eLife. 2026 Apr 28;15:RP110161. doi: 10.7554/eLife.110161 (PMC13124150; doi:10.7554/eLife.110161)
Supplement: Figure 2—figure supplement 2—source data 3. [file elife-110161-fig2-figsupp2-data3.xlsx]

## Sheet: Sheet1
[Acd] (mM)	OD600
0	1.631
0.1	6.776
0.2	9.144
0.4	9.166
0.6	11.432
0.8	11.638
1	12.786
